# Supplementary material
Source: MDPI journal article supplement (https://www.mdpi.com/2221-3759/7/3/18)

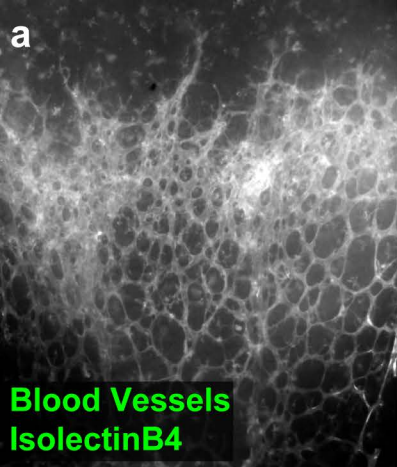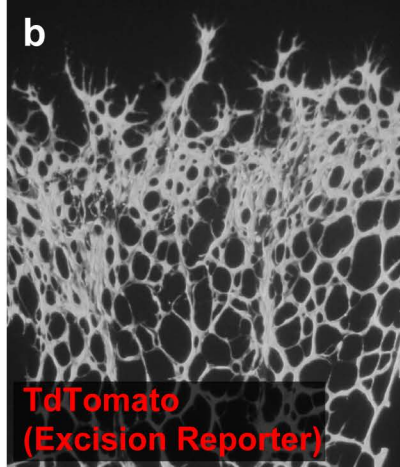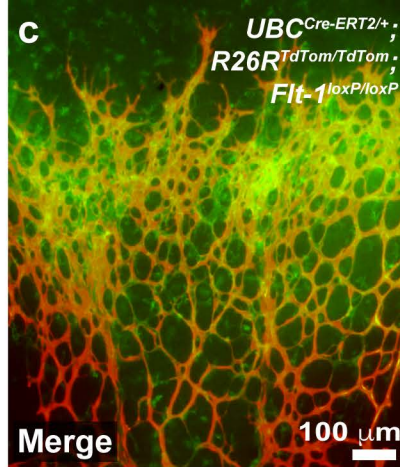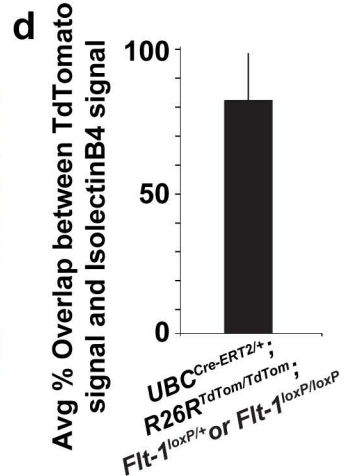

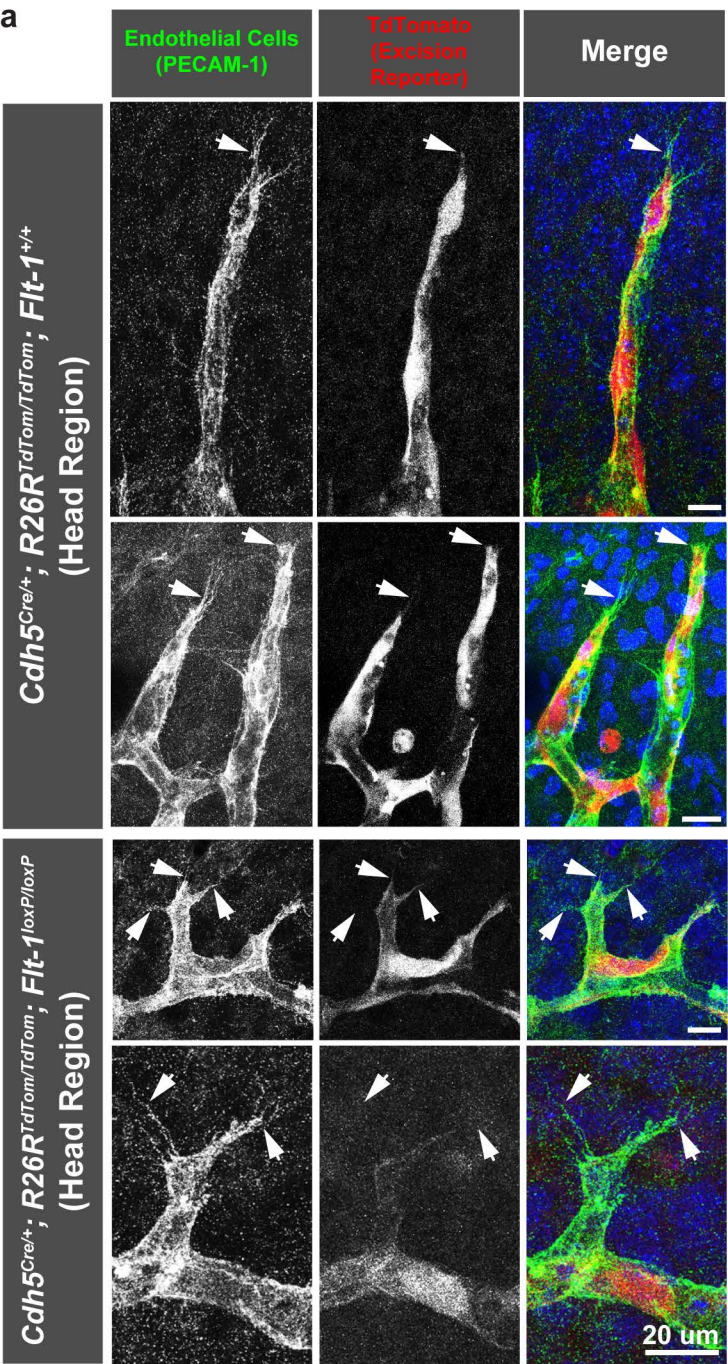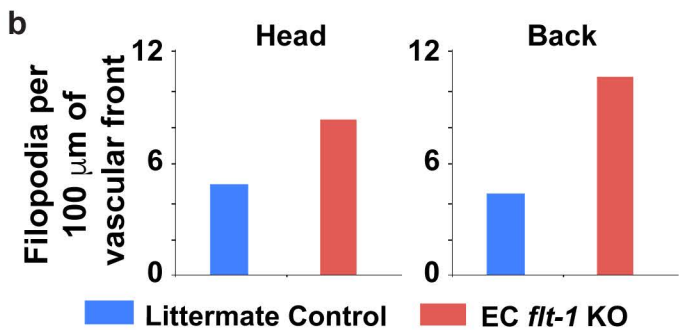

*flt-1*<sup>LacZ/+</sup> Retinal Vascular Front - Postnatal Day 8 (P8)

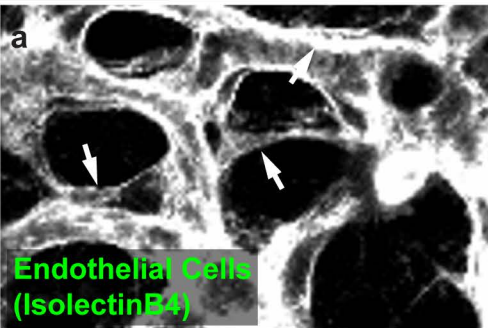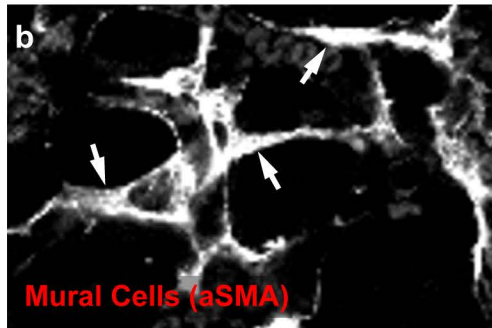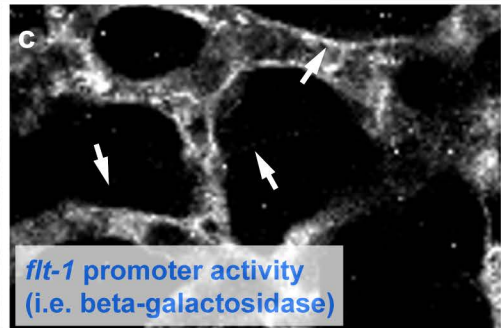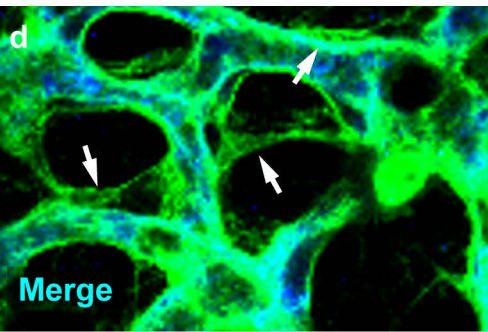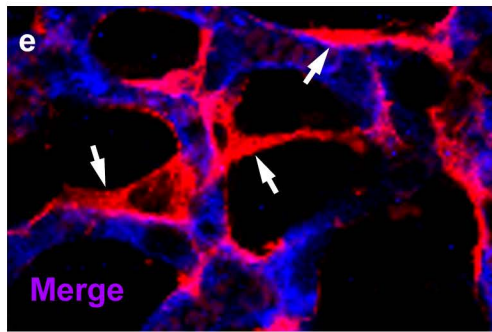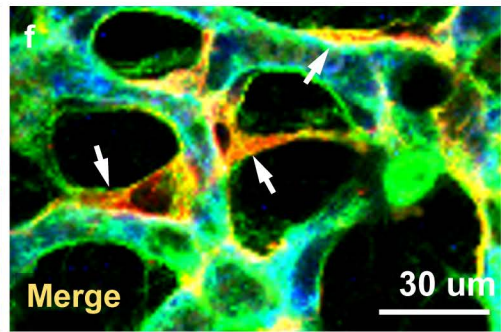



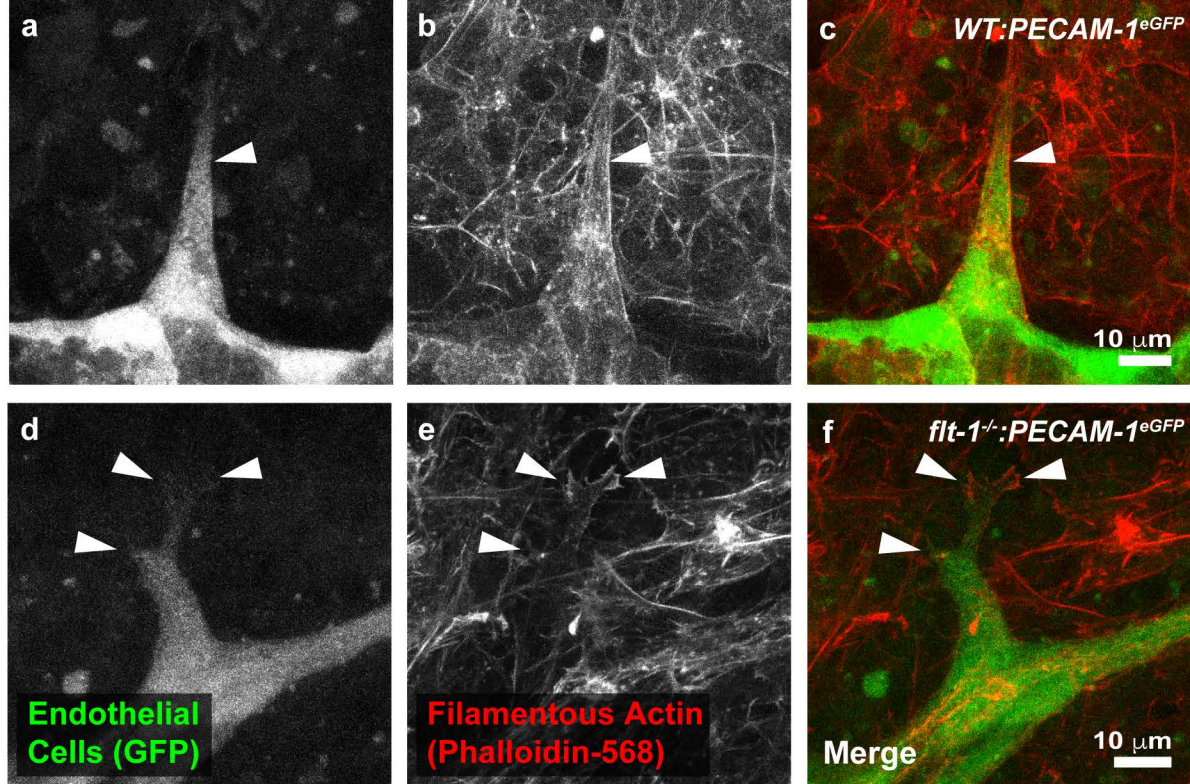

Time Lapse -- *flt-1<sup>-/-</sup>:PECAM-1<sup>eGFP</sup>* ES Cell-Derived Vessels

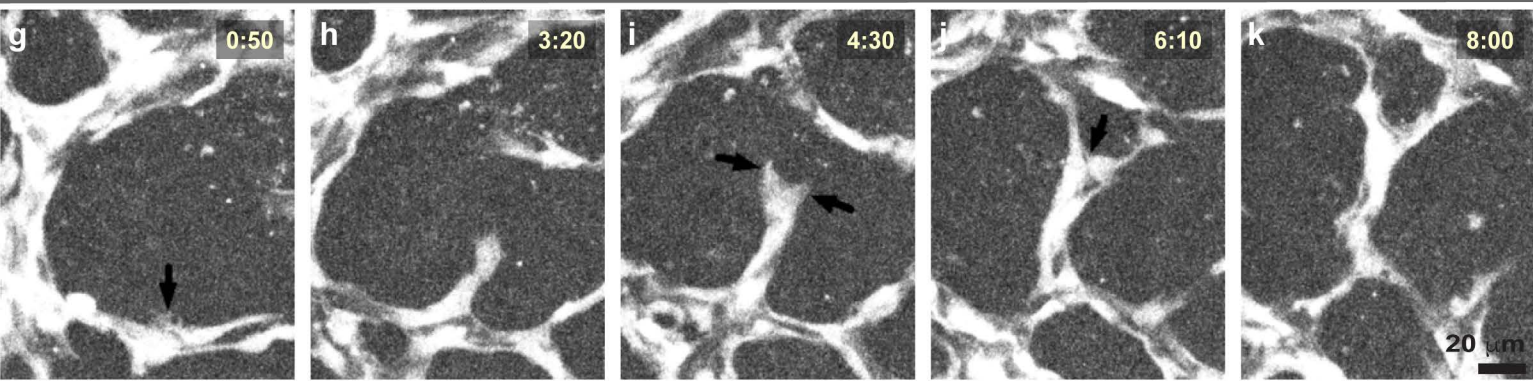

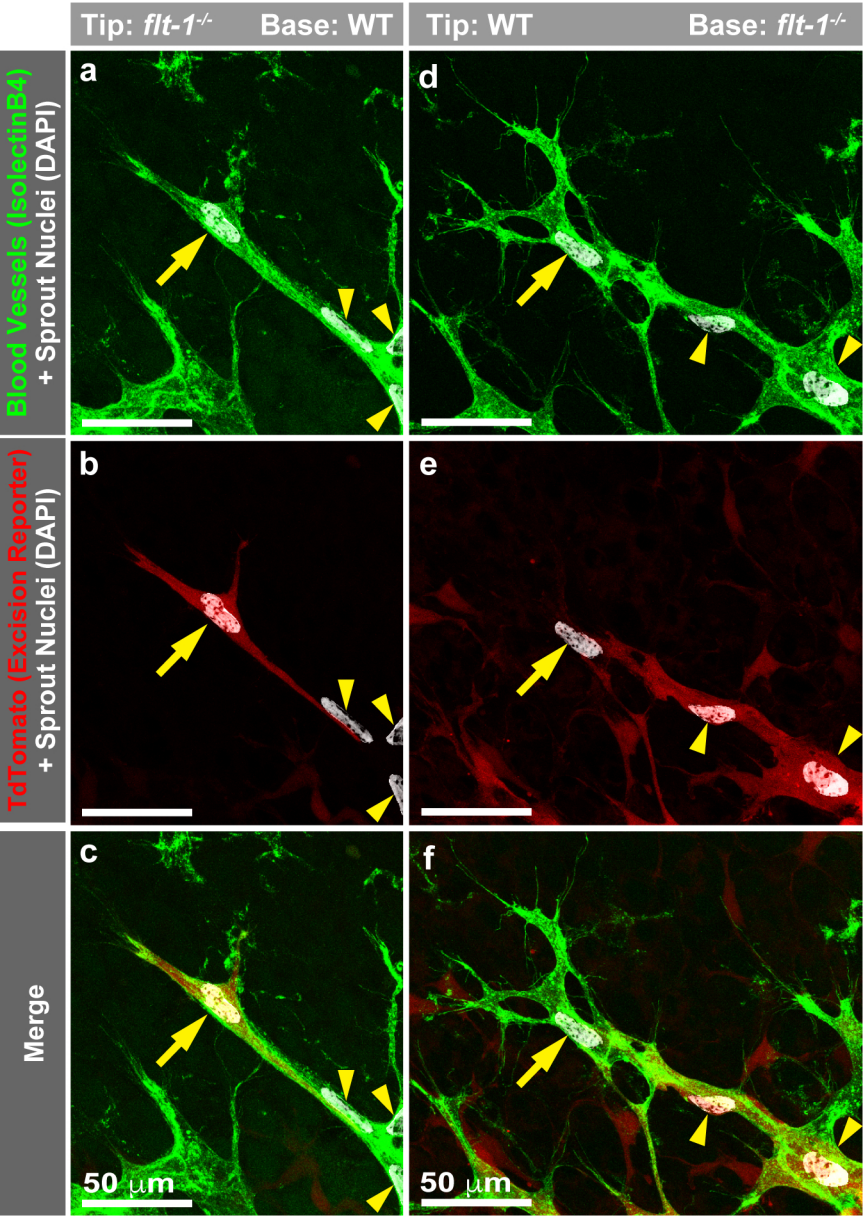

Supplement: s1 [file s1]
